# Supplementary material
Source: PubMed Central journal article supplement (PMC8595496)
Supplement: NIHMS1720979-supplement-supinfo.pdf [file NIHMS1720979-supplement-supinfo.pdf]

Supplemental Table 1. Final model for estimating cardiorespiratory fitness<sup>a</sup> (VO<sub>2</sub>peak, mL/kg/min) using a usual-paced 400m long distance corridor walk: Study of Energy and Aging – Pilot (N=34)

| <b>Variable</b>                                   | <b>β Coefficient<br/>(Standard Error)</b> | <b>P-value</b> | <b>Partial R<sup>2</sup></b> |
|---------------------------------------------------|-------------------------------------------|----------------|------------------------------|
| Intercept                                         | 65.40 (10.54)                             |                |                              |
| Usual-paced 400m walk time <sup>b</sup> , per 30s | 1.46 (0.04)                               | .0002          | 0.41                         |
| Age, years                                        | -0.31 (0.17)                              | .03            | 0.08                         |
| Physical fatigue score <sup>c</sup>               | -0.37 (0.17)                              | .03            | 0.08                         |

Model R<sup>2</sup> = 0.57

<sup>a</sup>Measured using a treadmill cardiopulmonary exercise testing with a modified Balke protocol

<sup>b</sup>Participants asked to walk at their “usual or normal walking pace” down a long corridor marked with traffic cones spaced 20m apart

<sup>c</sup>Measured using the Situational Fatigue Scale
